# Supplementary material for: Temperature effects induced by NIR photo-stimulation within Ist and IInd optical biological windows of seed-mediated multi-shell nanoferrites
Source: Royal Society of Chemistry journal article supplement (doi:10.1039/d2dt04178b), 2023-01-01
Supplement: d2dt04178b1.pdf [file d2dt04178b1.pdf]

***Temperature effects induced by NIR photo-stimulation within I<sup>st</sup> and II<sup>nd</sup> optical biological window of seed-mediated multi-shell nanoferrites***

Magdalena Kulpa-Greszta<sup>1</sup>, Anna Tomaszewska<sup>1</sup>, Andrzej Dziedzic<sup>2</sup>, Robert Pązik<sup>1\*</sup>

<sup>1</sup>*Department of Biotechnology, Institute of Biology and Biotechnology, College of Natural Sciences, University of Rzeszow, Pigonia 1, 35-310 Rzeszow, Poland*

<sup>3</sup>*Department of Spectroscopy and Materials, Institute of Physics, College of Natural Sciences, University of Rzeszow, Pigonia 1, 35-310 Rzeszow, Poland*

\*Corresponding author: Robert Pązik (UR), rpazik@ur.edu.pl

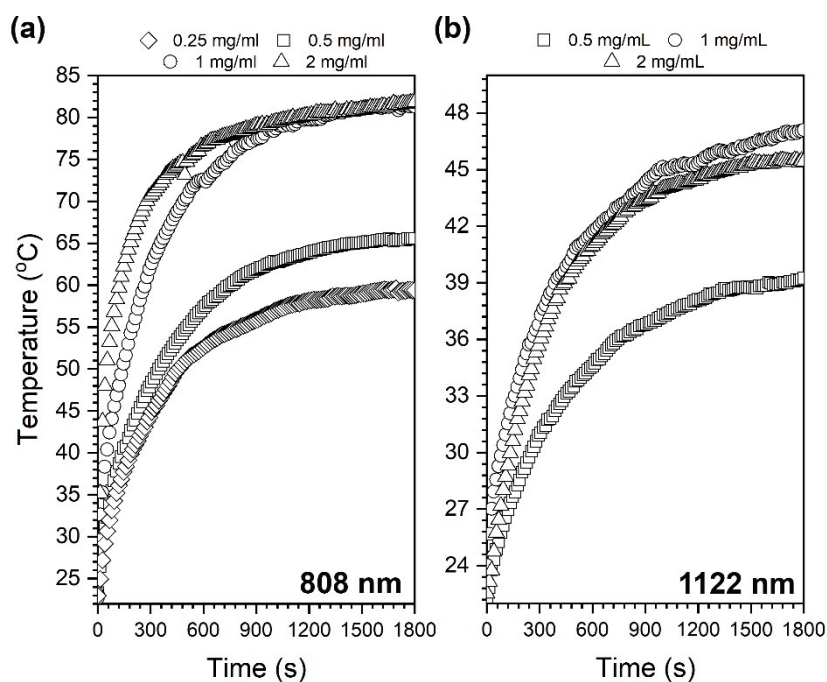

Figure S1. Heating curves of the CoFe<sub>2</sub>O<sub>4</sub> core particles, measured as a function of the thermoseeds concentration for 808 nm and 1122 nm laser stimulation. As it can be observed the decrease of the particle concentration leads to decrease of the heating ability.

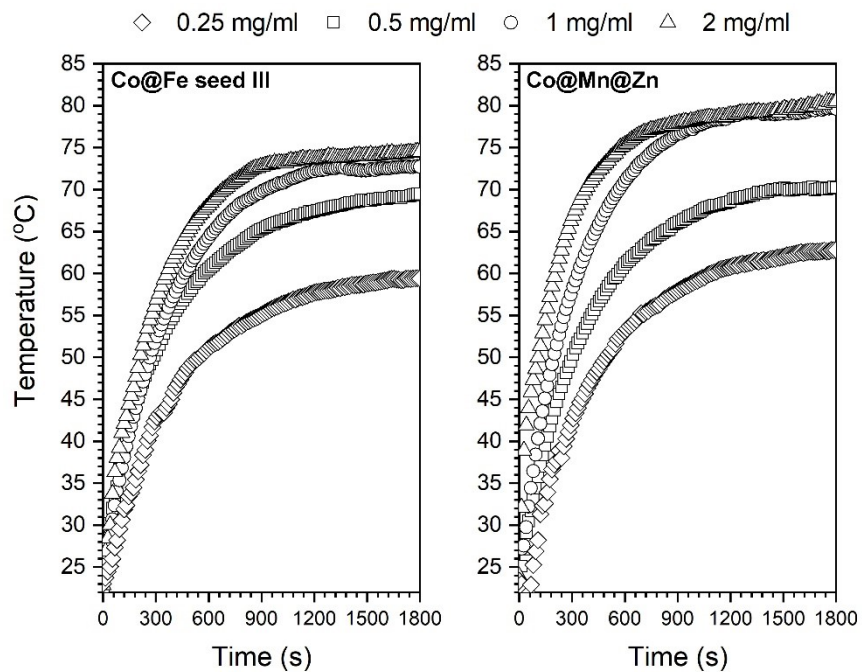

Figure s2. Heating curves of the Co@Fe and Co@Mn@Zn particles, measured as a function of the thermoseeds concentration for 808 nm laser stimulation. As it can be observed the decrease of the particle concentration leads to decrease of the heating ability.
